# Supplementary material for: Fibroblasts Mediate Ectopic Bone Formation of Calcium Phosphate Ceramics
Source: MDPI journal article supplement (doi:10.3390/ma15072569), 2022-03-31
Supplement: s1 [file s1]

# Fibroblasts Mediate Ectopic Bone Formation of Calcium Phosphate Ceramics

Liangliang Fu <sup>1,2,†</sup>, Qin Zhao <sup>1,†</sup>, Jiaojiao Li <sup>1</sup>, Zifan Zhao <sup>1</sup>, Min Wang <sup>1,2</sup>, Huifang Sun <sup>1,2</sup> and Haibin Xia <sup>1,2,\*</sup>

<sup>1</sup> The State Key Laboratory Breeding Base of Basic Science of Stomatology (Hubei-MOST) & Key Laboratory of Oral Biomedicine Ministry of Education, School & Hospital of Stomatology, Wuhan University, Wuhan, 430079, China; fuliangliang@whu.edu.cn (L.F.); zhaoqin@whu.edu.cn (Q.Z.); 2021203040020@whu.edu.cn (J.L.); zzfan1020@163.com (Z.Z.); 83wangmin@whu.edu.cn (M.W.); huifang.sun@whu.edu.cn (H.S.)

<sup>2</sup> Department of Oral Implantology, School and Hospital of Stomatology, Wuhan University, Wuhan, 430079, China

\* Correspondence: xhaibin@whu.edu.cn

† Liangliang Fu and Qin Zhao contributed equally to this work.

**Table S1.** Gene sequences for qRT-PCR.

| Genes           | Primer sequence         |
|-----------------|-------------------------|
| <i>Col1a1</i> F | TGGCAAAGACGGACTCAAC     |
| <i>Col1a1</i> R | GGCAGGAAGCTGAAGTCATAA   |
| <i>Tgfb1</i> F  | TGATACGCCTGAGTGGCTGTCT  |
| <i>Tgfb1</i> R  | CACAAGAGCAGTGAGCGCTGAA  |
| <i>Acta2</i> F  | TGCTGACAGAGGCACCACTGAA  |
| <i>Acta2</i> R  | CAGTTGTACGTCCAGAGGCATAG |
| <i>Bmp2</i> F   | AACACCGTGCGCAGCTTCCATC  |
| <i>Bmp2</i> R   | CGGAAGATCTGGAGTTCTGCAG  |
| <i>Igf1</i> F   | CATACTGCTTCCTTGGGGTCA   |
| <i>Igf1</i> R   | CCAGGCAAGGGGAATGATCT    |
| <i>Gapdh</i> F  | AGGTCGGTGTGAACGGATTG    |
| <i>Gapdh</i> R  | GGGGTCGTTGATGGCAACA     |
